# Supplementary material for: The Mental Health Burden of Patients with Colorectal Cancer Receiving Care during the COVID-19 Pandemic: Results of the PICO-SM Study
Source: Cancers (Basel). 2023 Feb 15;15(4):1226. doi: 10.3390/cancers15041226 (PMC9954113; doi:10.3390/cancers15041226)
Supplement: Supplementary file 1 [file cancers-15-01226-s001.zip › cancers-2193369-SI.pdf]

## Supplementary Table S1

Overview of participants' experience of the COVID-19 pandemic during the study period (2021).

|                                                                                                    | Number, <i>n</i> (%) |
|----------------------------------------------------------------------------------------------------|----------------------|
| <b>Conditions and/or comorbidities which may increase personal risk of being ill with COVID-19</b> |                      |
| Yes                                                                                                | 67 (31.0)            |
| No                                                                                                 | 125 (57.9)           |
| <i>Prefer not to say</i>                                                                           | 24 (11.1)            |
| <b>Would like to have testing for COVID-19, <i>n</i> = 158</b>                                     |                      |
| Yes                                                                                                | 62 (39.2%)           |
| No                                                                                                 | 96 (60.8%)           |
| <b>Have had testing for COVID-19</b>                                                               |                      |
| <b>Yes</b>                                                                                         | <b>171 (79.2%)</b>   |
| Tested positive                                                                                    | 9/171 (5.3%)         |
| <b>No</b>                                                                                          | <b>43 (19.9%)</b>    |
| <i>Did not answer</i>                                                                              | 2 (0.9%)             |
| <b>Have had COVID-19 requiring hospitalisation</b>                                                 |                      |
| Yes                                                                                                | 3 (1.4%)             |
| No                                                                                                 | 203 (94.0%)          |
| <i>Did not answer</i>                                                                              | 10 (4.6%)            |
| <b>Concerned they might get COVID-19</b>                                                           |                      |
| Extremely                                                                                          | 12 (5.6%)            |
| Very much                                                                                          | 18 (8.3%)            |
| Moderately                                                                                         | 48 (22.2%)           |
| Slightly                                                                                           | 78 (36.1%)           |
| Not at all                                                                                         | 54 (25.0%)           |
| <i>Did not answer</i>                                                                              | 6 (2.8%)             |
| <b>Concerned that COVID-19 had/will have a negative impact on their cancer treatment</b>           |                      |
| Yes                                                                                                | 58 (26.9%)           |
| No                                                                                                 | 128 (59.3%)          |
| Don't know                                                                                         | 27 (12.5%)           |
| <i>Did not answer</i>                                                                              | 3 (1.4%)             |
| <b>More concerned about COVID-19 rather than their cancer</b>                                      |                      |
| Yes                                                                                                | 14 (6.5%)            |
| No                                                                                                 | 193 (89.4%)          |
| <i>Did not answer</i>                                                                              | 9 (4.2%)             |
| <b>Key concerns about cancer treatment and care during COVID-19 pandemic<sup>a</sup></b>           |                      |
| Concerned cancer will come back or progress while waiting for treatment                            | 37 (17.1%)           |
| Where to get help with dealing with side effects                                                   | 16 (7.4%)            |
| Uncertainty around when treatment or tests will restart                                            | 14 (6.5%)            |
| Lack of contact with clinical team                                                                 | 12 (5.6%)            |
| Who to contact if felt cancer has come back or spread                                              | 10 (4.6%)            |
| Surveillance scans cancelled and concern over backlog                                              | 9 (4.2%)             |

## Supplementary Table S2

Comparison between the demographic characteristics of the longitudinal subgroup of  $n = 95$  participants followed-up across two timepoints, 6 months apart. McNemar test or related-samples Wilcoxon signed-rank test were used to compare the participants' answers between timepoints 1 and 2 of the survey.

|                                                                                 | Timepoint 1        | Timepoint 2        | P value                                                          | Statistical Method                                 |
|---------------------------------------------------------------------------------|--------------------|--------------------|------------------------------------------------------------------|----------------------------------------------------|
|                                                                                 | Number, $n$<br>(%) | Number, $n$<br>(%) |                                                                  |                                                    |
| <b>Gender</b>                                                                   |                    |                    |                                                                  |                                                    |
| Male                                                                            | 57 (60.0)          | 58 (61.1)          | 0.999                                                            | McNemar Test<br>(Male vs Female)                   |
| Female                                                                          | 35 (36.8)          | 35 (36.8)          |                                                                  |                                                    |
| Other                                                                           | 1 (1.1)            | 1 (1.1)            |                                                                  |                                                    |
| <i>Prefer not to say</i>                                                        | 2 (2.1)            | 1 (1.1)            |                                                                  |                                                    |
| <b>Mean age (years)</b>                                                         | 65.0 $\pm$ 9.1     |                    |                                                                  |                                                    |
| <b>Ethnicity</b>                                                                |                    |                    |                                                                  |                                                    |
| White/White British                                                             | 89 (93.7)          | 90 (94.7)          | 0.655                                                            | Related-Samples<br>Wilcoxon<br>Signed Rank<br>Test |
| Asian/Asian British (Indian,<br>Pakistani, Bangladeshi)                         | 1 (1.1)            | 2 (2.1)            |                                                                  |                                                    |
| Black/Black British                                                             | 1 (1.1)            |                    |                                                                  |                                                    |
| Other                                                                           | 2 (2.1)            | 2 (2.1)            |                                                                  |                                                    |
| <i>Prefer not to say</i>                                                        | 2 (2.1)            | 1 (1.1)            |                                                                  |                                                    |
| <b>Marital Status</b>                                                           |                    |                    |                                                                  |                                                    |
| Single/Divorced/Separated/Widowed                                               | 30 (31.6)          | 31 (32.6)          | 0.999                                                            | McNemar Test                                       |
| In a relationship/Married/In civil<br>partnership                               | 63 (66.3)          | 63 (66.3)          |                                                                  |                                                    |
| <i>Prefer not to say</i>                                                        | 2 (2.1)            | 1 (1.1)            |                                                                  |                                                    |
| <b>Have children</b>                                                            |                    |                    |                                                                  |                                                    |
| Yes                                                                             | 69 (72.6)          | 71 (74.7)          | 0.999                                                            | McNemar Test<br>(Yes vs No)                        |
| No                                                                              | 23 (24.2)          | 22 (23.2)          |                                                                  |                                                    |
| <i>Prefer not to say</i>                                                        | 3 (3.2)            | 2 (2.1)            |                                                                  |                                                    |
| <b>Lives alone</b>                                                              |                    |                    |                                                                  |                                                    |
| Yes                                                                             | 23 (24.2)          | 25 (26.3)          | 0.999                                                            | McNemar Test<br>(Yes vs No)                        |
| No                                                                              | 69 (72.6)          | 69 (72.6)          |                                                                  |                                                    |
| <i>Prefer not to say</i>                                                        | 3 (3.2)            | 1 (1.1)            |                                                                  |                                                    |
| <b>Previous/Underlying diagnosis of<br/>mental health condition<sup>a</sup></b> |                    |                    |                                                                  |                                                    |
| <b>Yes</b>                                                                      | 16 (16.8)          | 18 (18.9)          | 0.999<br>0.999<br>0.999<br><br><br><br><br><br><br><br><br>0.804 | McNemar Test<br>(Yes vs No)                        |
| Anxiety                                                                         | 9 (9.5)            | 8 (8.4)            |                                                                  |                                                    |
| Depression                                                                      | 7 (7.4)            | 7 (7.4)            |                                                                  |                                                    |
| Panic attacks                                                                   | 1 (1.1)            | 1 (1.1)            |                                                                  |                                                    |
| Obsessive compulsive disorder                                                   | 0 (0.0)            | 0 (0.0)            |                                                                  |                                                    |
| Post-traumatic stress disorder                                                  | 0 (0.0)            | 0 (0.0)            |                                                                  |                                                    |
| Bipolar affective disorder                                                      | 0 (0.0)            | 0 (0.0)            |                                                                  |                                                    |
| Personality disorder                                                            | 0 (0.0)            | 0 (0.0)            |                                                                  |                                                    |
| Alcohol/drugs                                                                   | 0 (0.0)            | 0 (0.0)            |                                                                  |                                                    |
| Anorexia                                                                        | 0 (0.0)            | 0 (0.0)            |                                                                  |                                                    |
| Social phobia                                                                   | 0 (0.0)            | 0 (0.0)            |                                                                  |                                                    |
| Other                                                                           | 0 (0.0)            | 0 (0.0)            |                                                                  |                                                    |
| None of the above                                                               | 78 (82.1)          | 75 (78.9)          |                                                                  |                                                    |
| <i>Prefer not to say</i>                                                        | 1 (1.1)            | 2 (2.1)            |                                                                  |                                                    |

|                                                                                                                                                                                                                                                                                                                                                                                                                                                                                                                                        |                                                                      |                                                                        |                                      |                                           |
|----------------------------------------------------------------------------------------------------------------------------------------------------------------------------------------------------------------------------------------------------------------------------------------------------------------------------------------------------------------------------------------------------------------------------------------------------------------------------------------------------------------------------------------|----------------------------------------------------------------------|------------------------------------------------------------------------|--------------------------------------|-------------------------------------------|
| <b>Self-reported perception of current status of cancer<sup>a</sup></b><br><b>Stable disease</b><br>(Shrinking/responding well to treatment, under control or stable, Have finished treatment & have routine monitoring scans/check-ups, Have had curative treatment & no active cancer)<br><b>Progressive disease</b><br>(Progressing/getting worse)<br><b>Unknown</b><br>(Recently diagnosed & waiting for treatment to start, undergoing investigations at this stage, Don't know or not certain, Other, <i>Prefer not to say</i> ) | 66 (69.5)<br><br><br><br><br>7 (7.4)<br><br>22 (23.2)                | 70 (73.7)<br><br><br><br><br>18 (18.9)<br><br>7 (7.4)                  | <b>0.015</b>                         | Related-Samples Wilcoxon Signed Rank Test |
| <b>Concerned they might get COVID-19</b><br>Extremely<br>Very much<br>Moderately<br>Slightly<br>Not at all<br><i>Did not answer</i>                                                                                                                                                                                                                                                                                                                                                                                                    | 6 (6.3)<br>7 (7.4)<br>20 (21.1)<br>34 (35.8)<br>26 (27.4)<br>2 (2.1) | 1 (1.1)<br>17 (17.9)<br>28 (29.5)<br>28 (29.5)<br>19 (20.0)<br>2 (2.1) | 0.065                                | Related-Samples Wilcoxon Signed Rank Test |
| <b>Conditions and/or comorbidities which may increase personal risk of being ill with COVID-19</b><br>Yes<br>No                                                                                                                                                                                                                                                                                                                                                                                                                        | 27 (28.4)<br>68 (71.6)                                               | 40 (42.1)<br>55 (57.9)                                                 | <b>0.041</b>                         | McNemar Test                              |
| <b>Would like to have testing for COVID-19,</b><br>Yes<br>No<br><i>Did not answer</i>                                                                                                                                                                                                                                                                                                                                                                                                                                                  | 25 (26.3)<br>45 (47.4)<br>25 (26.3)                                  | 27 (28.4)<br>41 (43.2)<br>27 (28.4)                                    | 0.581                                | McNemar Test (Yes vs No)                  |
| <b>Have had testing for COVID-19</b><br><b>Yes</b><br>Tested positive<br><b>No</b><br><i>Did not answer</i>                                                                                                                                                                                                                                                                                                                                                                                                                            | 72 (75.8)<br>1/72 (1.4)<br>21 (22.1)<br>2 (2.1)                      | 80 (84.2)<br>4/80 (5.0)<br>14 (14.7)<br>1 (1.1)                        | Test<br>0.115<br>Positivity<br>0.500 | McNemar Test (Yes vs No) & (Pos vs Neg)   |
| <b>Have had COVID-19 requiring hospitalisation</b><br>Yes<br>No<br><i>Did not answer</i>                                                                                                                                                                                                                                                                                                                                                                                                                                               | 1 (1.1)<br>89 (93.7)<br>5 (5.3)                                      | 1 (1.1)<br>88 (92.6)<br>6 (6.3)                                        | 0.999                                | McNemar Test (Yes vs No)                  |
| <b>Concerned that COVID-19 had/will have a negative impact on their cancer treatment</b><br>Yes<br>No<br>Don't know<br><i>Did not answer</i>                                                                                                                                                                                                                                                                                                                                                                                           | 25 (26.3)<br>54 (56.8)<br>14 (14.7)<br>2 (2.1)                       | 27 (28.4)<br>57 (60.0)<br>9 (9.5)<br>2 (2.1)                           | 0.144                                | Related-Samples Wilcoxon Signed Rank Test |
| <b>More concerned about COVID-19 rather than their cancer</b><br>Yes<br>No<br><i>Did not answer</i>                                                                                                                                                                                                                                                                                                                                                                                                                                    | 8 (8.4)<br>81 (85.3)<br>6 (6.3)                                      | 6 (6.3)<br>86 (90.5)<br>3 (3.2)                                        | 0.727                                | McNemar Test (Yes vs No)                  |

|                                                                                             |           |           |              |                                                    |
|---------------------------------------------------------------------------------------------|-----------|-----------|--------------|----------------------------------------------------|
| <b>Key concerns about cancer treatment and care during COVID-19 pandemic<sup>a</sup></b>    |           |           |              |                                                    |
| Concerned cancer will come back or progress while waiting for treatment                     | 17 (17.3) | 20 (21.1) | 0.804        | McNemar Test<br>(Yes vs No)                        |
| Where to get help with dealing with side effects                                            | 7 (7.4)   | 8 (8.4)   | 0.999        |                                                    |
| Uncertainty around when treatment or tests will restart                                     | 6 (6.3)   | 10 (10.5) | 0.289        |                                                    |
| Lack of contact with clinical team                                                          | 5 (5.3)   | 10 (10.5) | 0.388        |                                                    |
| Who to contact if felt cancer has come back or spread                                       | 4 (4.2)   | 9 (9.5)   | 0.219        |                                                    |
| Surveillance scans cancelled and concern over backlog                                       | 4 (4.2)   | 3 (3.2)   | 0.999        |                                                    |
| <b>Felt COVID-19 pandemic has affected mental health</b>                                    |           |           |              |                                                    |
| Extremely                                                                                   | 1 (1.1)   | 0 (0.0)   | 0.129        | Related-Samples<br>Wilcoxon<br>Signed Rank<br>Test |
| Very much                                                                                   | 3 (3.2)   | 6 (6.3)   |              |                                                    |
| Moderately                                                                                  | 16 (16.8) | 14 (14.7) |              |                                                    |
| Slightly                                                                                    | 21 (22.1) | 30 (31.6) |              |                                                    |
| Not at all                                                                                  | 49 (51.6) | 43 (45.3) |              |                                                    |
| <i>Did not answer</i>                                                                       | 5 (3.3)   | 2 (2.1)   |              |                                                    |
| <b>Mental health has affected experience of cancer care</b>                                 |           |           |              |                                                    |
| Yes                                                                                         | 7 (7.4)   | 10 (10.5) | 0.868        | Related-Samples<br>Wilcoxon<br>Signed Rank<br>Test |
| No                                                                                          | 84 (88.4) | 82 (86.3) |              |                                                    |
| <i>Prefer not to say</i>                                                                    | 4 (4.2)   | 3 (3.2)   |              |                                                    |
| <b>Have received support from primary cancer hospital for mental health during COVID-19</b> |           |           |              |                                                    |
| Yes                                                                                         | 6 (6.3)   | 5 (5.3)   | 0.235        | Related-Samples<br>Wilcoxon<br>Signed Rank<br>Test |
| No                                                                                          | 30 (31.6) | 24 (25.3) |              |                                                    |
| Did not need support                                                                        | 56 (58.9) | 59 (62.1) |              |                                                    |
| <i>Prefer not to say</i>                                                                    | 3 (3.2)   | 7 (7.4)   |              |                                                    |
| <b>Wanted more support for mental health during COVID-19</b>                                |           |           |              |                                                    |
| Yes                                                                                         | 5 (5.3)   | 5 (5.3)   | 0.999        | McNemar Test<br>(Yes vs No)                        |
| No                                                                                          | 88 (92.6) | 82 (86.2) |              |                                                    |
| <i>Prefer not to say</i>                                                                    | 2 (2.1)   | 8 (8.5)   |              |                                                    |
| <b>Personal coping strategies</b>                                                           |           |           |              |                                                    |
| <b>Yes<sup>a</sup></b>                                                                      | 77 (81.1) | 71 (74.7) | <b>0.036</b> | McNemar Test<br>(Yes vs No)                        |
| Focussing on positives                                                                      | 60 (63.2) | 48 (50.5) |              |                                                    |
| Using humour                                                                                | 38 (40.0) | 33 (34.7) |              |                                                    |
| Change in physical activity (e.g. exercise)                                                 | 33 (34.7) | 25 (26.3) |              |                                                    |
| Avoiding thinking about it                                                                  | 27 (28.4) | 29 (30.5) |              |                                                    |
| Planning time                                                                               | 23 (24.2) | 14 (14.7) |              |                                                    |
| Distracting self                                                                            | 18 (18.9) | 17 (17.9) |              |                                                    |
| Changes in diet (e.g. types of food, amount)                                                | 8 (8.4)   | 12 (12.6) |              |                                                    |
| Using religious or spiritual practice(s)                                                    | 11 (11.6) | 14 (14.7) |              |                                                    |
| Talking to medical professions                                                              | 10 (10.5) | 7 (7.4)   |              |                                                    |
| Using meditation, mindfulness or other relaxation techniques                                | 10 (10.5) | 12 (12.6) |              |                                                    |

|                                                                |                  |                  |              |                                           |
|----------------------------------------------------------------|------------------|------------------|--------------|-------------------------------------------|
| Changing substance intake (e.g. smoking, alcohol, other drugs) | 4 (4.2)          | 4 (4.2)          | 0.999        |                                           |
| Other                                                          | 2 (2.1)          | 2 (2.1)          | 0.999        |                                           |
| <b>None of the above</b>                                       | <b>18 (18.9)</b> | <b>23 (24.2)</b> | <b>0.332</b> |                                           |
| <i>Did not answer</i>                                          | 0 (0.0)          | 1(1.1)           |              |                                           |
| <b>Support: Cancer team</b>                                    |                  |                  |              |                                           |
| Extremely                                                      | 49 (51.6)        | 49 (51.6)        | 0.498        | Related-Samples Wilcoxon Signed Rank Test |
| Very much                                                      | 24 (25.3)        | 31 (32.6)        |              |                                           |
| Moderately                                                     | 6 (6.3)          | 7 (7.4)          |              |                                           |
| Slightly                                                       | 7 (7.4)          | 5 (5.3)          |              |                                           |
| Not at all                                                     | 4 (4.2)          | 2 (2.1)          |              |                                           |
| <i>Did not answer</i>                                          | 5 (5.3)          | 1 (1.1)          |              |                                           |
| <b>Support: Specialist Nurse</b>                               |                  |                  |              |                                           |
| Extremely                                                      | 36 (37.9)        | 35 (36.8)        | 0.265        | Related-Samples Wilcoxon Signed Rank Test |
| Very much                                                      | 17 (17.9)        | 15 (15.8)        |              |                                           |
| Moderately                                                     | 9 (9.5)          | 15 (15.8)        |              |                                           |
| Slightly                                                       | 3 (3.2)          | 5 (5.3)          |              |                                           |
| Not at all                                                     | 14 (14.7)        | 13 (13.7)        |              |                                           |
| <i>Did not answer</i>                                          | 16 (16.8)        | 12 (12.7)        |              |                                           |
| <b>Support: My GP</b>                                          |                  |                  |              |                                           |
| Extremely                                                      | 23 (24.2)        | 15 (15.8)        | <b>0.004</b> | Related-Samples Wilcoxon Signed Rank Test |
| Very much                                                      | 13 (13.7)        | 13 (13.7)        |              |                                           |
| Moderately                                                     | 13 (13.7)        | 15 (15.8)        |              |                                           |
| Slightly                                                       | 9 (9.5)          | 14 (14.7)        |              |                                           |
| Not at all                                                     | 30 (31.6)        | 34 (35.8)        |              |                                           |
| <i>Did not answer</i>                                          | 7 (7.4)          | 4 (4.2)          |              |                                           |
| <b>Support: Community Services</b>                             |                  |                  |              |                                           |
| Extremely                                                      | 20 (21.1)        | 13 (13.7)        | 0.093        | Related-Samples Wilcoxon Signed Rank Test |
| Very much                                                      | 7 (7.4)          | 15 (15.8)        |              |                                           |
| Moderately                                                     | 15 (15.8)        | 12 (12.6)        |              |                                           |
| Slightly                                                       | 12 (12.6)        | 6 (6.3)          |              |                                           |
| Not at all                                                     | 27 (28.4)        | 38 (40.0)        |              |                                           |
| <i>Did not answer</i>                                          | 14 (14.7)        | 11 (11.6)        |              |                                           |
| <b>Support: Government</b>                                     |                  |                  |              |                                           |
| Extremely                                                      | 9 (9.5)          | 8 (8.4)          | <b>0.010</b> | Related-Samples Wilcoxon Signed Rank Test |
| Very much                                                      | 19 (20.0)        | 8 (8.4)          |              |                                           |
| Moderately                                                     | 22 (23.2)        | 23 (24.2)        |              |                                           |
| Slightly                                                       | 14 (14.7)        | 15 (15.8)        |              |                                           |
| Not at all                                                     | 23 (24.2)        | 34 (35.8)        |              |                                           |
| <i>Did not answer</i>                                          | 8 (8.4)          | 7 (7.4)          |              |                                           |
| <b>Support: Friends/Family</b>                                 |                  |                  |              |                                           |
| Extremely                                                      | 67 (70.5)        | 64 (67.4)        | 0.291        | Related-Samples Wilcoxon Signed Rank Test |
| Very much                                                      | 18 (18.9)        | 23 (24.2)        |              |                                           |
| Moderately                                                     | 4 (4.2)          | 2 (2.1)          |              |                                           |
| Slightly                                                       | 1 (1.1)          | 3 (3.2)          |              |                                           |
| Not at all                                                     | 1 (1.1)          | 1 (1.1)          |              |                                           |
| <i>Did not answer</i>                                          | 4 (4.2)          | 2 (2.1)          |              |                                           |

<sup>a</sup>more than one option to question possible

### Supplementary Table S3

Univariate and multivariate analyses of factors associated with anxiety (GAD-7  $\geq 5$ ), depression (PHQ-9  $\geq 10$ ) and poor well-being (WHO-5  $< 50$ ), for the longitudinal subgroup of  $n = 95$  participants followed-up across two timepoints, 6 months apart. Variables with  $P < 0.10$  on univariate analyses were included in the final model respectively. Abbreviations: GAD-7, Generalized Anxiety Disorder scale; PHQ-9, Patient Health Questionnaire-9; WHO-5, World Health Organization Well-being Index. Abbreviations: GAD-7, Generalized Anxiety Disorder scale; PHQ-9, Patient Health Questionnaire-9; WHO-5, World Health Organization Well-being Index.

| Variable                                                                                | Univariate Analysis |                   |              | Multivariate Analysis |                     |              |
|-----------------------------------------------------------------------------------------|---------------------|-------------------|--------------|-----------------------|---------------------|--------------|
|                                                                                         | Odds Ratio          | 95% CI            | P value      | Odds Ratio            | 95% CI              | P value      |
| <b>FACTORS ASSOCIATED WITH ANXIETY (GAD-7 <math>\geq 5</math>)</b>                      |                     |                   |              |                       |                     |              |
| Concerned regarding cancer treatment                                                    | 8.32                | 2.53-27.38        | <0.001       |                       |                     |              |
| <b>Concerned might get COVID-19</b>                                                     | <b>2.78</b>         | <b>1.52-5.08</b>  | <b>0.001</b> | <b>4.42</b>           | <b>1.23-15.88</b>   | <b>0.023</b> |
| <b>Effect on mental health</b>                                                          | <b>4.01</b>         | <b>1.20-13.45</b> | <b>0.024</b> | <b>2.96</b>           | <b>1.08-8.14</b>    | <b>0.036</b> |
| Support from Christie                                                                   | 18.13               | 1.89-174.04       | 0.007        |                       |                     |              |
| Mental health affect care                                                               | 7.96                | 1.97-32.19        | 0.005        |                       |                     |              |
| Wanted more support                                                                     | 21.23               | 2.19-205.51       | 0.005        |                       |                     |              |
| <b>Past history: Depression</b>                                                         | <b>12.86</b>        | <b>2.26-73.02</b> | <b>0.004</b> | <b>62.03</b>          | <b>3.87-994.18</b>  | <b>0.004</b> |
| Past history: None of the above                                                         | 0.22                | 0.07-0.66         | 0.005        |                       |                     |              |
| Concerned cancer will come back or progress while waiting for treatment                 | 3.88                | 1.29-11.65        | 0.012        |                       |                     |              |
| Who to contact if felt cancer has come back or spread                                   | 3.79                | 0.91-15.79        | 0.075        |                       |                     |              |
| <b>Coping: Talking to medical professions</b>                                           | <b>6.49</b>         | <b>1.31-32.04</b> | <b>0.028</b> | <b>42.42</b>          | <b>2.47-728.00</b>  | <b>0.010</b> |
| Coping: Avoiding thinking about it                                                      | 3.33                | 1.18-9.43         | 0.019        |                       |                     |              |
| <b>FACTORS ASSOCIATED WITH DEPRESSION (PHQ-9 <math>\geq 10</math>)</b>                  |                     |                   |              |                       |                     |              |
| Concerned might get COVID-19                                                            | 3.69                | 1.64-8.33         | 0.002        | <b>18.17</b>          | <b>2.33-141.92</b>  | <b>0.006</b> |
| Effect on mental health                                                                 | 8.20                | 2.13-31.56        | 0.002        |                       |                     |              |
| Concerned that COVID-19 had/will have a negative impact on their cancer treatment (Q10) | 3.79                | 0.97-14.79        | 0.069        |                       |                     |              |
| Mental health affect care                                                               | 19.00               | 4.18-86.33        | <0.001       | <b>51.73</b>          | <b>1.25-2143.32</b> | <b>0.038</b> |
| Support from Christie                                                                   | 12.33               | 1.81-86.33        | 0.017        | <b>132.09</b>         | <b>2.16-8064.64</b> | <b>0.020</b> |
| Wanted more support                                                                     | 42.86               | 4.19-437.93       | 0.001        |                       |                     |              |
| Past history: Depression                                                                | 6.42                | 1.23-33.36        | 0.043        |                       |                     |              |
| Past history: None of the above                                                         | 0.17                | 0.05-0.63         | 0.004        |                       |                     |              |
| Concerned cancer will come back or progress while waiting for treatment                 | 3.24                | 0.90-11.61        | 0.061        |                       |                     |              |
| Where to get help with dealing with side effects                                        | 5.20                | 1.06-25.47        | 0.027        |                       |                     |              |
| Coping: Avoiding thinking about it                                                      | 3.88                | 1.12-13.51        | 0.025        |                       |                     |              |
| Support: Specialist nurse                                                               | 0.66                | 0.43-1.00         | 0.051        |                       |                     |              |

| <b>FACTORS ASSOCIATED WITH POOR WELL-BEING (WHO-5 &lt;50)</b>                              |       |             |       |             |                   |              |
|--------------------------------------------------------------------------------------------|-------|-------------|-------|-------------|-------------------|--------------|
| Past history: None of the above                                                            | 0.26  | 0.09-0.79   | 0.013 | <b>0.11</b> | <b>0.02-0.63</b>  | <b>0.013</b> |
| Self-reported perception of current status of cancer<br>Progressive disease/Stable disease | 2.79  | 0.91-8.58   | 0.067 |             |                   |              |
| Self-reported perception of current status of cancer<br>Unknown/Stable disease             | 0.73  | 0.08-6.60   | 0.999 |             |                   |              |
| Concerned might get COVID-19                                                               | 2.34  | 1.35-4.04   | 0.002 | <b>4.18</b> | <b>1.71-10.17</b> | <b>0.002</b> |
| Effect on mental health                                                                    | 1.84  | 1.10-3.09   | 0.021 |             |                   |              |
| Mental health affect care                                                                  | 6.70  | 1.68-26.73  | 0.008 |             |                   |              |
| Support from Christie                                                                      | 6.28  | 0.75-40.77  | 0.065 |             |                   |              |
| Wanted more support                                                                        | 17.87 | 1.86-171.51 | 0.007 |             |                   |              |
| Coping: Focusing on positives                                                              | 0.31  | 0.11-0.87   | 0.023 | <b>0.07</b> | <b>0.01-0.38</b>  | <b>0.002</b> |
| Coping: Avoiding thinking about it                                                         | 3.42  | 1.15-9.37   | 0.014 | <b>8.31</b> | <b>1.82-38.02</b> | <b>0.006</b> |
